# Supplementary material for: Cardiac MR modelling of systolic and diastolic blood pressure
Source: PubMed Central journal article supplement (PMC10749049; doi:10.1136/openhrt-2023-002484), 2023-12-18
Supplement: openhrt-2023-002484supp001.pdf [file openhrt-2023-002484supp001.pdf]

1 **Supplementary tables**2 **Table S1** – Stepwise multivariable linear regression analysis for systolic blood pressure.

| Dependent Y                               | <b>SBP</b>  |                |             |        |          |              |
|-------------------------------------------|-------------|----------------|-------------|--------|----------|--------------|
| Least squares multiple regression         |             |                |             |        |          |              |
| Method                                    | Stepwise    |                |             |        |          |              |
| Enter variable if P<                      | 0.05        |                |             |        |          |              |
| Remove variable if P>                     | 0.1         |                |             |        |          |              |
| Sample size                               | 220         |                |             |        |          |              |
| Coefficient of determination R2           | 0.1169      |                |             |        |          |              |
| R2-adjusted                               | 0.1088      |                |             |        |          |              |
| Multiple correlation coefficient          | 0.342       |                |             |        |          |              |
| Residual standard deviation               | 24.291      |                |             |        |          |              |
| Regression Equation                       |             |                |             |        |          |              |
| Independent variables                     | Coefficient | Std. Error     | t           | P      | rpartial | rsemipartial |
| <b>(Constant)</b>                         | 83.845      |                |             |        |          |              |
| <b>Age</b>                                | 0.4225      | 0.11           | 3.84        | 0.0002 | 0.252    | 0.2          |
| <b>LV ejection fraction</b>               | 0.4187      | 0.1291         | 3.24        | 0.001  | 0.215    | 0.2          |
| Variables not included in the model       |             |                |             |        |          |              |
| <b>LA volume index</b>                    |             |                |             |        |          |              |
| <b>LV end-diastolic volume index</b>      |             |                |             |        |          |              |
| <b>LV end-systolic volume index</b>       |             |                |             |        |          |              |
| <b>Average systolic flow displacement</b> |             |                |             |        |          |              |
| Analysis of Variance                      |             |                |             |        |          |              |
| Source                                    | DF          | Sum of Squares | Mean Square |        |          |              |
| Regression                                | 2           | 16957          | 8479        |        |          |              |
| Residual                                  | 217         | 128043         | 590         |        |          |              |
| F-ratio                                   | 14.369      |                |             |        |          |              |
| Significance level                        | P<0.0001    |                |             |        |          |              |

3

1 **Table S2** – Stepwise multivariable linear regression analysis for diastolic blood pressure.

| Dependent Y                               | <b>DBP</b>  |                |             |        |          |              |
|-------------------------------------------|-------------|----------------|-------------|--------|----------|--------------|
| Least squares multiple regression         |             |                |             |        |          |              |
| Method                                    | Stepwise    |                |             |        |          |              |
| Enter variable if P<                      | 0.05        |                |             |        |          |              |
| Remove variable if P>                     | 0.1         |                |             |        |          |              |
| Sample size                               |             |                |             |        |          |              |
|                                           | 220         |                |             |        |          |              |
| Coefficient of determination R2           |             |                |             |        |          |              |
|                                           | 0.09157     |                |             |        |          |              |
| R2-adjusted                               |             |                |             |        |          |              |
|                                           | 0.07896     |                |             |        |          |              |
| Multiple correlation coefficient          |             |                |             |        |          |              |
|                                           | 0.3026      |                |             |        |          |              |
| Residual standard deviation               |             |                |             |        |          |              |
|                                           | 12.7421     |                |             |        |          |              |
| Regression Equation                       |             |                |             |        |          |              |
| Independent variables                     | Coefficient | Std. Error     | t           | P      | rpartial | rsemipartial |
| <b>(Constant)</b>                         | 58.8591     |                |             |        |          |              |
| <b>Body surface area</b>                  | 8.2279      | 3.538          | 2.326       | 0.021  | 0.156    | 0.1508       |
| <b>Aortic forward flow</b>                | -0.1229     | 0.03532        | -3.479      | 0.0006 | -0.230   | 0.2256       |
| <b>LV mass index</b>                      | 0.1738      | 0.05738        | 3.028       | 0.0028 | 0.201    | 0.1964       |
| Variables not included in the model       |             |                |             |        |          |              |
| <b>LV ejection fraction</b>               |             |                |             |        |          |              |
| <b>LV stroke volume index</b>             |             |                |             |        |          |              |
| <b>Average systolic flow displacement</b> |             |                |             |        |          |              |
| <b>Systolic forward flow</b>              |             |                |             |        |          |              |
| <b>Aortic backward flow</b>               |             |                |             |        |          |              |
| Analysis of Variance                      |             |                |             |        |          |              |
| Source                                    | DF          | Sum of Squares | Mean Square |        |          |              |
| Regression                                | 3           | 3535.19        | 1178.4      |        |          |              |
| Residual                                  | 216         | 35069.7        | 162.36      |        |          |              |
| F-ratio                                   |             |                |             |        |          |              |
|                                           | 7.2579      |                |             |        |          |              |
| Significance level                        |             |                |             |        |          |              |
|                                           | P=0.0001    |                |             |        |          |              |

2

2
